# Supplementary material
Source: publisher site journal article supplement (https://www.dovepress.com/article/360802)
Supplement: Supplementary file 1 [file get_supplementary_file.php]

**Supplementary data**

**Methods for model development**

The patients in the entire cohort were randomly divided into the training and validation cohorts with a ratio of 7:3. Given the numerous candidate predictors (33 variables) and the limited sample size (90 cases in the entire cohort), a standard logistic regression with variable selection for model development would lead to large estimated coefficients of the model, overfitting, and unstable. Thus, the variable selection method based on the penalty function was used. The least absolute shrinkage and selection operator (LASSO), proposed by Tibshirani26, is a method that can also be utilized for biomarker selection in high dimensional data. This method minimizes the residual sum of squares by subjecting um of the absolute value of the coefficients being less than a tuning parameter (λ) in the linear regression model or minimizes the negative log-likelihood in the binary logistic regression model. It can compress the estimate of unimportant predictors to zero at a certain λ to exclude those predictors and handle “multicollinearity” among the predictors Tibshirani26. The optimal λ can be selected by cross-validation. We firstly assume all the continuous predictors exert a linear relationship to the outcome and put all the variables into Lasso logistic regression for variables selection and coefficients estimation in the training cohort. However, some continuous variables may exhibit a non-linear relationship to the outcome, and simply dichotomizing continuous predictors is paired with significant information loss27. Therefore, we transform the continuous variables by restricted cubic splines (RCS) with 3 or 4 knots. The knots are selected based on the Akaike information criterion (AIC) 28. The matrix derived from a continuous variable by RCS was assigned to one group and was subjected to group Lasso for feature selection combined with other predictors 29. In group Lasso, the variables in one group either all enter the model or are all eliminated. The Lasso scores were calculated by multiplying the selected variables with corresponding coefficients and summing them and were then served as single predictive factors and input into a standard logistic regression to obtain the predicted probability and linear predictors. Next, the formula of the Lasso scores was substituted, and thereafter the predicted probability and linear predictors can be calculated from individually selected variables. The models based on Lasso (lLasso) and group Lasso (gLasso) were subsequently compared in both the training and validation cohorts.

Table S1 Comparison of the clinical/laboratory data between training and validation cohorts

| **Cohorts** | **Training** | **Validation** | **P-value** |
| --- | --- | --- | --- |
| N | 63 | 27 |  |
| Age at diagnosis (months) | 22.0 (13.0-37.0) | 25.0 (11.0-40.0) | 0.944 |
| Age at recurrence (months) | 35.0 (24.5-51.5) | 34.0 (18.5-53.5) | 0.853 |
| Interval (months) | 9.0 (4.5-17.0) | 7.0 (3.0-14.0) | 0.845 |
| Fever duration (d) | 6.0 (5.0-7.0) | 6.0 (5.0-8.5) | 0.387 |
| CRP (mg/L) | 60.0 (19.0-96.0) | 90.0 (25.5-154.0) | 0.075 |
| WBC (10^9/L) | 12.5 ± 5.3 | 13.7 ± 4.3 | 0.219 |
| HGB (g/L) | 117.5 ± 12.1 | 115.5 ± 13.5 | 0.509 |
| Alb (g/L) | 35.8 ± 5.3 | 35.2 ± 4.0 | 0.252 |
| PLT (10^9/L) | 322.7 ± 96.7 | 339.6 ± 140.6 | 0.888 |
| ALT (U/L) | 21.7 (12.9-56.0) | 16.4 (11.1-38.7) | 0.214 |
| CK-MB (U/L) | 14.0 (10.0-20.0) | 14.0 (10.5-18.0) | 0.445 |
| AST (U/L) | 30.1 (24.5-45.4) | 30.7 (24.6-40.2) | 0.439 |
| Neutrophils (10^9/L) | 8.4 ± 5.0 | 10.0 ± 4.5 | 0.101 |
| N (%) | 62.4 ± 19.3 | 69.8 ± 15.1 | 0.088 |
| Lymphocyte (10^9/L) | 3.0 ± 1.4 | 2.6 ± 1.1 | 0.223 |
| L (%) | 24.4 (14.2-34.2) | 18.6 (14.5-23.1) | 0.078 |
| DB (μmol/L) | 1.3 (0.7-2.0) | 1.1 (0.5-1.8) | 0.111 |
| TB (μmol/L) | 7.1 (5.1-10.7) | 6.7 (5.4-8.8) | 0.134 |
| Prothrombin time (s) | 12.3 (11.4-13.7) | 13.2 (11.8-13.8) | 0.495 |
| Na (mmol/L) | 134.6 ± 3.6 | 135.2 ± 3.9 | 0.628 |
| ESR (mm/h) | 62.9 ± 27.2 | 62.3 ± 28.2 | 0.822 |
| INR | 1.1 ± 0.2 | 1.1 ± 0.1 | 0.091 |
| KD type |  |  | 1.000 |
| Complete | 59 (93.7%) | 26 (96.3%) |  |
| Incomplete | 4 (6.3%) | 1 (3.7%) |  |
| Gender |  |  | 0.797 |
| Boys | 46 (73.0%) | 19 (70.4%) |  |
| Girls | 17 (27.0%) | 8 (29.6%) |  |
| Coronary artery complications |  |  | 0.029 |
| No | 39 (61.9%) | 23 (85.2%) |  |
| Yes | 24 (38.1%) | 4 (14.8%) |  |
| Rash |  |  | 0.441 |
| No | 16 (25.4%) | 9 (33.3%) |  |
| Yes | 47 (74.6%) | 18 (66.7%) |  |
| Conjunctival injection |  |  | 0.007 |
| No | 5 (7.9%) | 8 (29.6%) |  |
| Yes | 58 (92.1%) | 19 (70.4%) |  |
| Oral mucosal change |  |  | 0.424 |
| No | 4 (6.3%) | 3 (11.1%) |  |
| Yes | 59 (93.7%) | 24 (88.9%) |  |
| Cervical lymphadenopathy |  |  | 0.787 |
| No | 8 (12.7%) | 4 (14.8%) |  |
| Yes | 55 (87.3%) | 23 (85.2%) |  |
| Edema of the hands and feet |  |  | 0.238 |
| No | 27 (42.9%) | 8 (29.6%) |  |
| Yes | 36 (57.1%) | 19 (70.4%) |  |
| Perianal change |  |  | 0.580 |
| No | 48 (76.2%) | 22 (81.5%) |  |
| Yes | 15 (23.8%) | 5 (18.5%) |  |
| Electrocardiogram change |  |  | 0.597 |
| No | 11 (17.5%) | 6 (22.2%) |  |
| Yes | 52 (82.5%) | 21 (77.8%) |  |
| IVIG resistance at the first episode |  |  | 1.000 |
| No | 56 (88.9%) | 24 (88.9%) |  |
| Yes | 7 (11.1%) | 3 (11.1%) |  |
| IVIG resistance at recurrence |  |  | 0.904 |
| No | 52 (82.5%) | 22 (81.5%) |  |
| Yes | 11 (17.5%) | 5 (18.5%) |  |

Note, IVIG, intravenous immunoglobulin; WBC, white blood cell count; N%, neutrophils percentage; L%, lymphocyte percentage; Na, serum sodium; TB, total bilirubin; DB, direct bilirubin; CRP, C-reactive protein; PLT, platelet; Hb, hemoglobin; ESR, erythrocyte sedimentation rate; ALB, serum albumin; ALT, serum alanine aminotransferase; AST, serum aspartate transaminase; CK-MB, creatine kinase MB; INR, international normalized ratio.

**Figure S1 Formulas of lLasso and gLasso models**


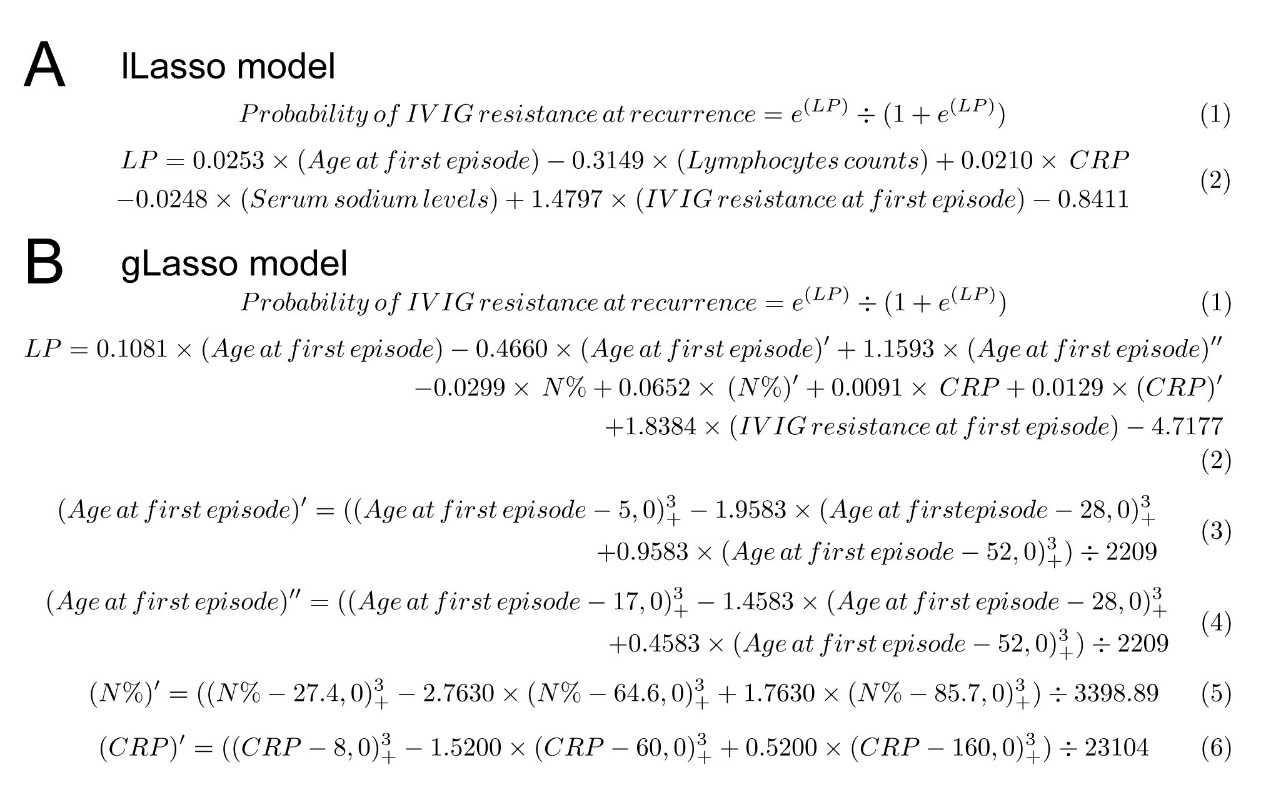


Figure S1. Formulas of lLasso model and gLasso model to predict IVIG resistance at recurrence in KD patients. (A) The probability of IVIG resistance at recurrence can be calculated from the linear predictor (LP) by formula 1. And LP of lLasso model can be calculated by summing the products of multiplying the selected variables and their coefficients (formula 2). B. The probability of IVIG resistance at recurrence can be calculated from the linear predictor (LP) by formula 1. And LP of gLasso model can be calculated by summing the products of multiplying the selected variables and their coefficients (formula 2). Notably, in gLasso model, the continuous variables are assumed to have non-linear relationships to the outcomes and expanded by restricted cubic splines (RCS). The continuous variables, age at the first episode, N%, and CRP, were modeled using RCS with 4, 3, and 3 knots, respectively, resulting in two (formula 3 and 4), one (formula 5), and one (formula 6) extra parameters, respectively.
